# Supplementary material for: α-Terpinyl Acetate: Occurrence in Essential Oils Bearing Thymus pulegioides, Phytotoxicity, and Antimicrobial Effects
Source: PubMed Central journal article supplement (PMC7922985; doi:10.3390/molecules26041065), 2021-02-18
Supplement: molecules-26-01065-s001.pdf [file molecules-26-01065-s001.pdf]

**Table S1.** Coordinates of investigated *Thymus pulegioides* habitats in Lithuania (habitat numbers coincident with numbers in Figure 2).

| Habitat No. | Coordinates LKS-94 |         | Habitat No. | Coordinates LKS-94 |         | Habitat No. | Coordinates LKS-94 |         | Habitat No. | Coordinates LKS-94 |         | Habitat No. | Coordinates LKS-94 |         |
|-------------|--------------------|---------|-------------|--------------------|---------|-------------|--------------------|---------|-------------|--------------------|---------|-------------|--------------------|---------|
|             | x                  | y       |             | x                  | y       |             | x                  | y       |             | x                  | y       |             | x                  | y       |
| 1           | 560988             | 6076662 | 28          | 561944             | 6029487 | 55          | 561861             | 6190592 | 82          | 510595             | 6100404 | 109         | 394051             | 6203883 |
| 2           | 563766             | 6076371 | 29          | 563082             | 6019552 | 56          | 548262             | 6139818 | 83          | 510852             | 6102223 | 110         | 404489             | 6197440 |
| 3           | 559500             | 6076279 | 30          | 546780             | 6023917 | 57          | 530613             | 6151242 | 84          | 498258             | 6135316 | 111         | 400943             | 6198671 |
| 4           | 573662             | 6072297 | 31          | 519832             | 5997870 | 58          | 511493             | 6129862 | 85          | 501724             | 6147566 | 112         | 390863             | 6210405 |
| 5           | 557363             | 6054470 | 32          | 438512             | 6201969 | 59          | 519366             | 6153392 | 86          | 419912             | 6230200 | 113         | 345409             | 6214259 |
| 6           | 533524             | 6049331 | 33          | 437745             | 6195064 | 60          | 528056             | 6161215 | 87          | 421023             | 6236021 | 114         | 381179             | 6205325 |
| 7           | 558296             | 6081737 | 34          | 444809             | 6191174 | 61          | 546374             | 6208651 | 88          | 403455             | 6238508 | 115         | 380147             | 6211860 |
| 8           | 583445             | 6132960 | 35          | 450815             | 6193926 | 62          | 433938             | 6180097 | 89          | 399116             | 6252320 | 116         | 376070             | 6218532 |
| 9           | 591825             | 6097432 | 36          | 443010             | 6197498 | 63          | 401554             | 6144104 | 90          | 390385             | 6242689 | 117         | 418512             | 6092718 |
| 10          | 625102             | 6107828 | 37          | 472988             | 6185459 | 64          | 421945             | 6174966 | 91          | 542671             | 6064977 | 118         | 422216             | 6088802 |
| 11          | 579937             | 6106677 | 38          | 457959             | 6223586 | 65          | 419695             | 6160383 | 92          | 542704             | 6058815 | 119         | 425867             | 6081288 |
| 12          | 616251             | 6164158 | 39          | 472988             | 6185459 | 66          | 537033             | 6078793 | 93          | 501329             | 6051845 | 120         | 356896             | 6120643 |
| 13          | 597114             | 6135492 | 40          | 476851             | 6190275 | 67          | 536669             | 6093163 | 94          | 491669             | 6044643 | 121         | 373472             | 6108949 |
| 14          | 606176             | 6161257 | 41          | 479020             | 6193079 | 68          | 527565             | 6079294 | 95          | 497226             | 6024930 | 122         | 371950             | 6115788 |
| 15          | 614875             | 6163033 | 42          | 482460             | 6200911 | 69          | 518082             | 6070819 | 96          | 486246             | 6009586 | 123         | 382267             | 6151259 |
| 16          | 623372             | 6167938 | 43          | 445762             | 6205382 | 70          | 507662             | 6031256 | 97          | 480160             | 6022418 | 124         | 406473             | 6161722 |
| 17          | 621997             | 6095470 | 44          | 444095             | 6229671 | 71          | 510884             | 6045525 | 98          | 475622             | 6094751 | 125         | 393387             | 6163261 |
| 18          | 639903             | 6124527 | 45          | 440126             | 6234592 | 72          | 508593             | 6035394 | 99          | 463756             | 6106688 | 126         | 398779             | 6167273 |
| 19          | 665335             | 6116216 | 46          | 437110             | 6240572 | 73          | 513144             | 6008301 | 100         | 407796             | 6144524 | 127         | 391222             | 6180245 |
| 20          | 594504             | 6192433 | 47          | 493334             | 6182178 | 74          | 507244             | 6001104 | 101         | 441508             | 6133459 | 128         | 320007             | 6203182 |
| 21          | 600279             | 6202737 | 48          | 500584             | 6184890 | 75          | 492604             | 5994789 | 102         | 451778             | 6103792 | 129         | 366363             | 6203923 |
| 22          | 586295             | 6047068 | 49          | 485106             | 6169161 | 76          | 415046             | 6045463 | 103         | 496649             | 6091787 | 130         | 350382             | 6201330 |
| 23          | 586132             | 6057504 | 50          | 548738             | 6124393 | 77          | 423780             | 6044447 | 104         | 508338             | 6072038 | 131         | 344455             | 6201012 |
| 24          | 598877             | 6036366 | 51          | 540430             | 6116958 | 78          | 418644             | 6035489 | 105         | 425391             | 6143465 |             |                    |         |
| 25          | 600014             | 6018454 | 52          | 556518             | 6137599 | 79          | 418459             | 6035541 | 106         | 440658             | 6148598 |             |                    |         |
| 26          | 615364             | 6012655 | 53          | 567458             | 6156518 | 80          | 429464             | 6091609 | 107         | 431088             | 6211596 |             |                    |         |
| 27          | 588581             | 6031131 | 54          | 563026             | 6170113 | 81          | 423780             | 6044447 | 108         | 400348             | 6217059 |             |                    |         |
